# Supplementary material
Source: MDPI journal article supplement (https://www.mdpi.com/2073-445X/13/5/632)
Supplement: s1 [file s1]

Supporting Information for

# Climate Warming Benefits Plant Growth but Not Net Carbon Uptake: Simulation of Alaska Tundra and Needle Leaf Forest Using LPJ-GUESS

Cui Liu <sup>1</sup>, Chuanhua Li <sup>1,2</sup> and Liangliang Li <sup>1</sup>

<sup>1</sup> College of Geography and Environmental Science, Northwest Normal University, Lanzhou 730070, China; lc1733133929@163.com (C.L.); allenecar@163.com (L.L.)

<sup>2</sup> Cryosphere Research Station on the Qinghai-Tibet Plateau, State Key Laboratory of Cryospheric Science, Northwest Institute of Eco-Environment and Resources, Chinese Academy of Sciences, Lanzhou 730000, China

\* Correspondence: lch\_nwnu@126.com

## Contents of this file

Text S1

Text S2

Text S3

## Introduction

The supporting information contains detailed information of FLUXNET data (Text S1).

The supporting information contains detailed information of CMIP6 data (Text S2).

The supporting information contains detailed information of Supplementary data (Text S3).

**Text S1.**

The FLUXNET data including:

ATQ and PRR sites[dataset] (<https://fluxnet.org/data/fluxnet2015-dataset/>)(Pastorello et al., 2020).

**Text S2.**

The CMIP6 temperature data including:

SSP1-2.6[dataset] (<https://www.wdc-climate.de/ui/cmip6?input=CMIP6.ScenarioMIP.MOHC.UKESM1-0-LL.ssp126.r1i1p1f2.CFmon.ta.gn.v20210426>, <https://doi.org/10.22033/ESGF/CMIP6.6333>)(Good et al., 2019a).

SSP2-4.5[dataset] (<https://www.wdc-climate.de/ui/cmip6?input=CMIP6.ScenarioMIP.MOHC.UKESM1-0-LL.ssp245.r1i1p1f2.CFmon.ta.gn.v20210428>, <https://doi.org/10.22033/ESGF/CMIP6.6339> )(Good et al., 2019b).

SSP5-8.5[dataset] (<https://www.wdc-climate.de/ui/cmip6?input=CMIP6.ScenarioMIP.MOHC.UKESM1-0-LL.ssp585.r1i1p1f2.CFmon.ta.gn.v20210426> , <https://doi.org/10.22033/ESGF/CMIP6.6405>)(Good et al., 2019c).

The CMIP6 precipitation data including :

SSP1-2.6[dataset] (<https://www.wdc-climate.de/ui/cmip6?input=CMIP6.ScenarioMIP.MOHC.UKESM1-0-LL.ssp126.r1i1p1f2.Amon.pr.gn.v20190503> , <https://doi.org/10.22033/ESGF/CMIP6.6333>)(Good et al., 2019a).

SSP2-4.5[dataset] (<https://www.wdc-climate.de/ui/cmip6?input=CMIP6.ScenarioMIP.MOHC.UKESM1-0-LL.ssp245.r1i1p1f2.Amon.pr.gn.v20190510> , <https://doi.org/10.22033/ESGF/CMIP6.6339>)(Good et al., 2019b).

SSP5-8.5[dataset] (<https://www.wdc-climate.de/ui/cmip6?input=CMIP6.ScenarioMIP.MOHC.UKESM1-0-LL.ssp585.r1i1p1f2.Amon.pr.gn.v20190507> , <https://doi.org/10.22033/ESGF/CMIP6.6405>)(Good et al., 2019c).

The CMIP6 solar radiation data including:

SSP1-2.6[dataset] (<https://www.wdc-climate.de/ui/cmip6?input=CMIP6.ScenarioMIP.CSIRO.ACCESS-ESM1-5.ssp126.r1i1p1f1.Emon.rss.gn.v20210318> , <http://doi.org/10.22033/ESGF/CMIP6.4320> )(Ziehn et al., 2019a).

SSP2-4.5[dataset] (<https://www.wdc-climate.de/ui/cmip6?input=CMIP6.ScenarioMIP.CSIRO.ACCESS-ESM1-5.ssp245.r1i1p1fl.Emon.rss.gn.v20191115> , <https://doi.org/10.22033/ESGF/CMIP6.4322>)(Ziehn et al., 2019b).

SSP5-8.5[dataset] (<https://www.wdc-climate.de/ui/cmip6?input=CMIP6.ScenarioMIP.CSIRO.ACCESS-ESM1-5.ssp585.r1i1p1fl.Emon.rss.gn.v20210318> , <http://doi.org/10.22033/ESGF/CMIP6.4333> )(Ziehn et al., 2019c).

The CMIP6 carbon dioxide data including:

SSP1-2.6[dataset] (<https://www.wdc-climate.de/ui/cmip6?input=CMIP6.ScenarioMIP.NCC.NorESM2-LM.ssp126.r1i1p1fl.AERmon.co2.gn.v20191108> , <https://doi.org/10.22033/ESGF/CMIP6.8248>)(Seland et al., 2019).

SSP2-4.5[dataset] (<https://www.wdc-climate.de/ui/cmip6?input=CMIP6.ScenarioMIP.NCC.NorESM2-MM.ssp245.r1i1p1fl.AERmon.co2.gn.v20191108>, <https://doi.org/10.22033/ESGF/CMIP6.8255>)(Bentsen et al., 2019a).

SSP5-8.5[dataset] (<https://www.wdc-climate.de/ui/cmip6?input=CMIP6.ScenarioMIP.NCC.NorESM2-MM.ssp585.r1i1p1fl.AERmon.co2.gn.v20191108> , <https://doi.org/10.22033/ESGF/CMIP6.8321>)(Bentsen et al., 2019b).

The CMIP6 gross primary production data including:

SSP1-2.6[dataset] (<https://www.wdc-climate.de/ui/cmip6?input=CMIP6.ScenarioMIP.CSIRO.ACCESS-ESM1-5.ssp126.r1i1p1fl.Lmon.gpp.gn.v20210318> , <http://doi.org/10.22033/ESGF/CMIP6.4320> )(Ziehn et al., 2019a).

SSP2-4.5[dataset] (<https://www.wdc-climate.de/ui/cmip6?input=CMIP6.ScenarioMIP.CSIRO.ACCESS-ESM1-5.ssp245.r1i1p1fl.Lmon.gpp.gn.v20191115> , <http://doi.org/10.22033/ESGF/CMIP6.4322> )(Ziehn et al., 2019b).

SSP5-8.5[dataset] (<https://www.wdc-climate.de/ui/cmip6?input=CMIP6.ScenarioMIP.CSIRO.ACCESS-ESM1-5.ssp585.r1i1p1fl.Lmon.gpp.gn.v20210318> . <http://doi.org/10.22033/ESGF/CMIP6.4333> )(Ziehn et al., 2019c).

The CMIP6 land area index data including:

SSP1-2.6[dataset] (<https://www.wdc-climate.de/ui/cmip6?input=CMIP6.ScenarioMIP.CSIRO.ACCESS-ESM1-5.ssp126.r1i1p1fl.Lmon.lai.gn.v20210318> , <http://doi.org/10.22033/ESGF/CMIP6.4320> )(Ziehn et al., 2019a).

SSP2-4.5[dataset] (<https://www.wdc-climate.de/ui/cmip6?input=CMIP6.ScenarioMIP.CSIRO.ACCESS-ESM1-5.ssp245.r1i1p1f1.Lmon.lai.gn.v20191115>, <http://doi.org/10.22033/ESGF/CMIP6.4322> )(Ziehn et al., 2019b).

SSP5-8.5[dataset] (<https://www.wdc-climate.de/ui/cmip6?input=CMIP6.ScenarioMIP.CSIRO.ACCESS-ESM1-5.ssp585.r1i1p1f1.Lmon.lai.gn.v20210318>, <http://doi.org/10.22033/ESGF/CMIP6.4333> )(Ziehn et al., 2019c).

### Text S3.

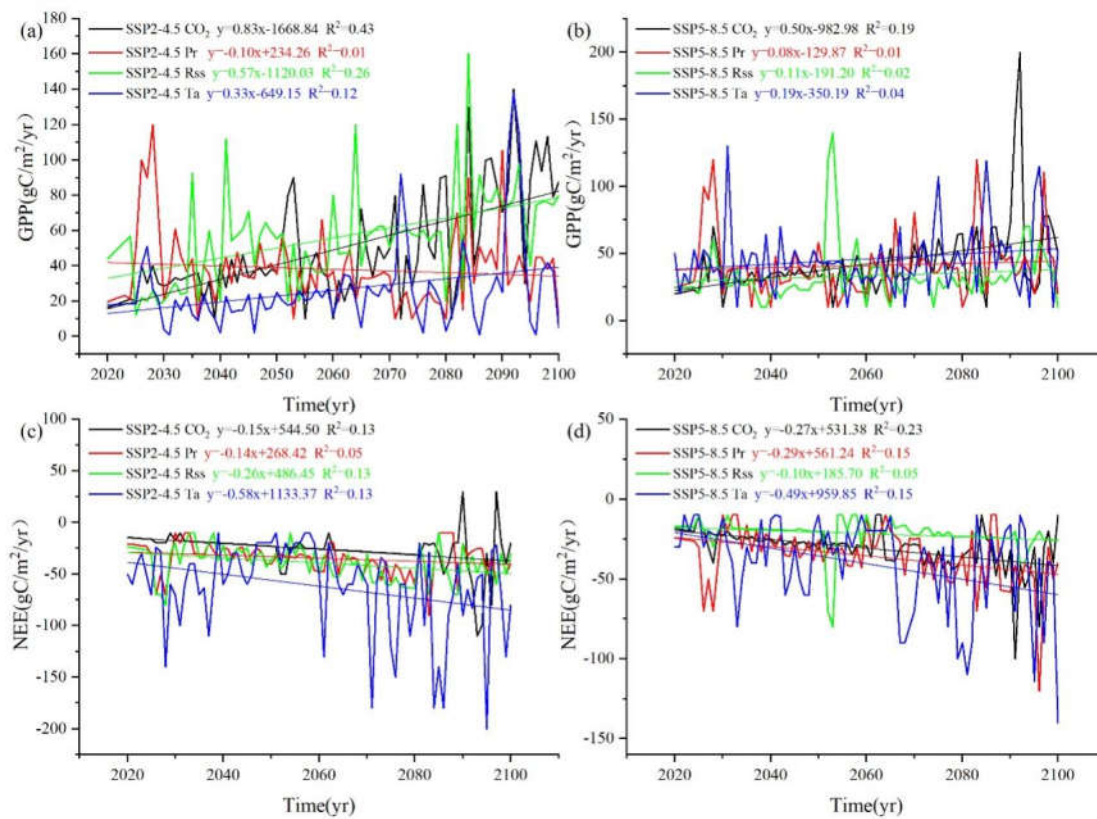

**Figure S1.** Relationships among GPP, NEE and CO<sub>2</sub> concentration, Precipitation, Solar radiation, and air temperature for ATQ tundra site under SSP2-4.5 (a, c) and SSP 5-8.5 (b, d)

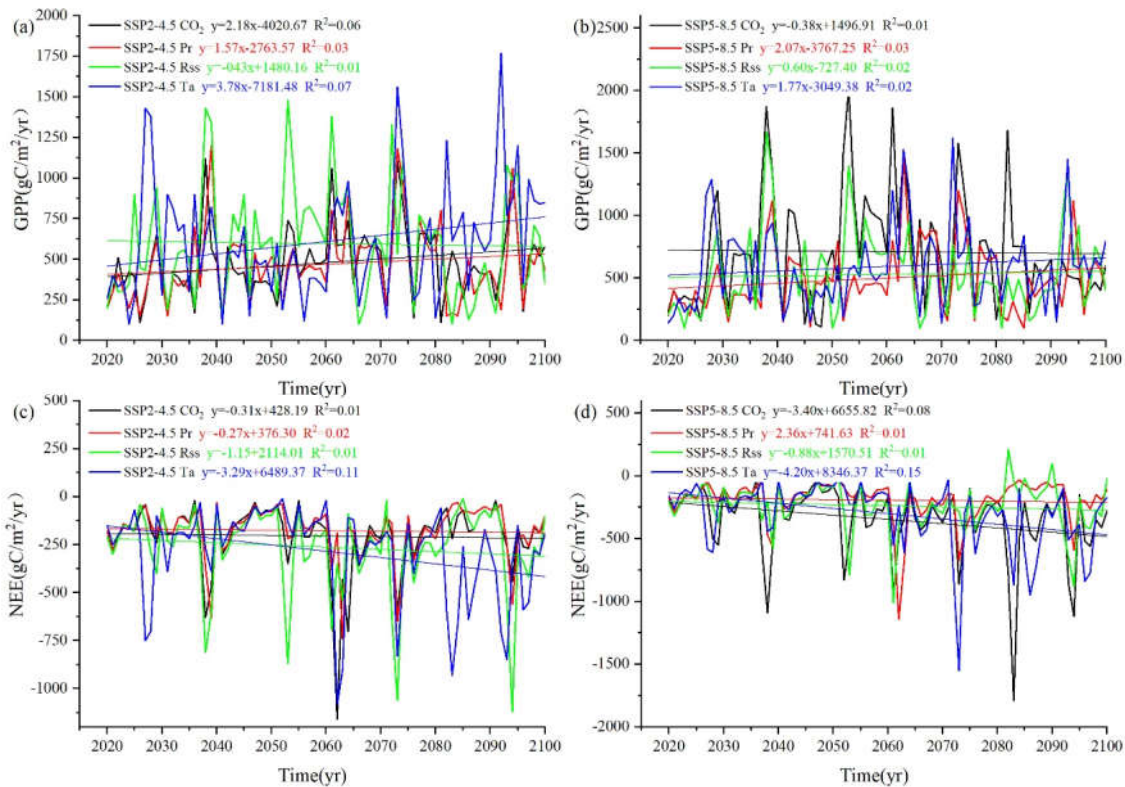

**Figure S2** Relationships among GPP, NEE and CO<sub>2</sub> concentration, Precipitation, Solar radiation, and air temperature for PRR needle leaf forest site under SSP2-4.5 (a, c) and SSP 5-8.5 (b, d)

## References

- Bentsen, M., Olivieri, D. J. L., Seland, Ø., Toniazio, T., Gjermundsen, A., Graff, L. S., . . . Schulz, M. (2019a). *NCC NorESM2-MM model output prepared for CMIP6 ScenarioMIP ssp245*. Retrieved from: <https://doi.org/10.22033/ESGF/CMIP6.8255>
- Bentsen, M., Olivieri, D. J. L., Seland, Ø., Toniazio, T., Gjermundsen, A., Graff, L. S., . . . Schulz, M. (2019b). *NCC NorESM2-MM model output prepared for CMIP6 ScenarioMIP ssp585*. Retrieved from: <https://doi.org/10.22033/ESGF/CMIP6.8321>
- Good, P., Sellar, A., Tang, Y., Rumbold, S., Ellis, R., Kelley, D., & Kuhlbrodt, T. (2019a). *MOHC UKESM1.0-LL model output prepared for CMIP6 ScenarioMIP ssp126*. Retrieved from: <https://doi.org/10.22033/ESGF/CMIP6.6333>
- Good, P., Sellar, A., Tang, Y., Rumbold, S., Ellis, R., Kelley, D., & Kuhlbrodt, T. (2019b). *MOHC UKESM1.0-LL model output prepared for CMIP6 ScenarioMIP ssp245*. Retrieved from: <https://doi.org/10.22033/ESGF/CMIP6.6339>
- Good, P., Sellar, A., Tang, Y., Rumbold, S., Ellis, R., Kelley, D., & Kuhlbrodt, T. (2019c). *MOHC UKESM1.0-LL model output prepared for CMIP6 ScenarioMIP ssp585*. Retrieved from: <https://doi.org/10.22033/ESGF/CMIP6.6405>
- Pastorello, G., Trotta, C., Canfora, E., Chu, H., Christianson, D., Cheah, Y.-W., . . . Papale, D. (2020). The FLUXNET2015 dataset and the ONEFlux processing pipeline for eddy covariance data. *Scientific Data*, 7(1), 225. doi:10.1038/s41597-020-0534-3

- Seland, Ø., Bentsen, M., Olivière, D. J. L., Toniazzi, T., Gjermundsen, A., Graff, L. S., . . . Schulz, M. (2019). *NCC NorESM2-LM model output prepared for CMIP6 ScenarioMIP ssp126*. Retrieved from: <https://doi.org/10.22033/ESGF/CMIP6.8248>
- Ziehn, T., Chamberlain, M., Lenton, A., Law, R., Bodman, R., Dix, M., . . . Druken, K. (2019a). *CSIRO ACCESS-ESM1.5 model output prepared for CMIP6 ScenarioMIP ssp126*. Retrieved from: <https://doi.org/10.22033/ESGF/CMIP6.4320>
- Ziehn, T., Chamberlain, M., Lenton, A., Law, R., Bodman, R., Dix, M., . . . Druken, K. (2019b). *CSIRO ACCESS-ESM1.5 model output prepared for CMIP6 ScenarioMIP ssp245*. Retrieved from: <https://doi.org/10.22033/ESGF/CMIP6.4322>
- Ziehn, T., Chamberlain, M., Lenton, A., Law, R., Bodman, R., Dix, M., . . . Druken, K. (2019c). *CSIRO ACCESS-ESM1.5 model output prepared for CMIP6 ScenarioMIP ssp585*. Retrieved from: <https://doi.org/10.22033/ESGF/CMIP6.4333>
